# Supplementary material
Source: PubMed Central journal article supplement (PMC7040156)
Supplement: 12551_2020_621_MOESM1_ESM.pdf [file 12551_2020_621_MOESM1_ESM.pdf]

## **SUPPORTING INFORMATION**

(Tables S1-S4)

### **Conformational landscape of substituted prolines**

Himal Kanti Ganguly\* and Gautam Basu\*

Department of Biophysics, Bose Institute,  
P-1/12 CIT scheme VII M, Kolkata – 700054, India.

\* Corresponding authors

**Table S1.** Dihedral angles of  $\alpha$ -substituted proline analogues in CSD.

| trans<br>/cis | name                                                         | $\phi^\circ$ | $\psi^\circ$ | $\chi_2^a$ | $d^b$ | $\theta^c$ | CSD code |
|---------------|--------------------------------------------------------------|--------------|--------------|------------|-------|------------|----------|
| <i>trans</i>  |                                                              |              |              |            |       |            |          |
|               | Ac-(2Me-Pro)-NHMe                                            | -60          | -25          | 36         | 3.00  | 121.8      | BIJDUT10 |
|               | Ac-(2Me-Pro)-OMe                                             | -45          | -40          | 41         | 2.71  | 110.5      | QECWON   |
|               | Cbz-(2Me-Pro)-OH                                             | 56           | 33           | -38        | 2.92  | 115.7      | NUKSES   |
|               | 4-BrBz-(2Ph-Pro)-NH <sub>2</sub>                             | 76           | -55          | 43         | 3.27  | 173.5      | LIVSUF   |
|               | 2-ClBz-(2Ph-Pro)-NH <sub>2</sub>                             | 78           | -37          | 41         | 3.30  | 169.6      | MOPKAD   |
|               | 2-Fur-(2Ph-Pro)-NH <sub>2</sub>                              | 78           | -55          | 43         | 3.27  | 175.4      | MOPKEH   |
|               | 4-Br-PhAc-(2(4NO <sub>2</sub> -Ph)<br>Pro)-O <sup>t</sup> Bu | -49          | -48          | 35/<br>-27 | 2.72  | 102.4      | GABWOX   |
|               | (Phe) <sub>2</sub> N-CO-(2N <sub>3</sub> -Pro)-OMe           | -60          | 153          | -35        | 2.83  | 94.4       | ZIKNAI   |
|               | 2-BrBz-(2(4Cl-Ph)-Pro)-NH <sub>2</sub>                       | 81           | -46          | 41         | 3.34  | 175.9      | ZICBUK   |
|               | Tfa-(2(1-(3-Hydroxyphenyl)<br>prop-2-en1-yl)-Pro)-OMe        | 59           | n.d.         | 40         | 3.35  | 172.3      | LIPGIC   |
|               |                                                              | 82           | n.d.         | 40         | 2.94  | 160.4      | LIPGIC   |
| <i>cis</i>    |                                                              |              |              |            |       |            |          |
|               | Boc-(2Me-Pro)-OH                                             | -52          | -33          | 39         | 4.13  | 145.8      | XETSOG   |
|               | Boc-(2Ph-Pro)-OH                                             | 42           | 46           | -36        | 4.16  | 136.3      | EVOPOU   |
|               | Boc-(2Vin-Pro)-OH                                            | -47          | -38          | 40         | 4.20  | 143.3      | UHOLOA   |
|               | Boc-(2(2F-Bn)-Pro)-OH                                        | -55          | 157          | 36/<br>-34 | 4.11  | 71.8       | AFIXOE   |

<sup>a</sup> The *exo* and *endo* ring puckers are shown in blue and red, respectively.

<sup>b</sup> 'd' corresponds to the distance (in Å) between carbonyl oxygen atom (O<sub>i-1</sub>) of the residue preceding Pro (or analog) and the carbon atom of the carbonyl group of Pro (or analog) >C<sub>i</sub>=O<sub>i</sub>.

<sup>c</sup>  $\theta$  corresponds to the angle between O<sub>i-1</sub>, C<sub>i</sub> and O<sub>i</sub>.

**Table S2.** Dihedral angles of 4-substituted proline analogues<sup>a</sup> in CSD.

| compound                                                 | $\phi^\circ$ | $\psi^\circ$ | $\chi_2^{b\circ}$ | $d^c$ | $\theta^{d\circ}$ | CSD code |
|----------------------------------------------------------|--------------|--------------|-------------------|-------|-------------------|----------|
| <b><i>trans</i>-(2S,4R)</b>                              |              |              |                   |       |                   |          |
| Ac-Mep-NHCH <sub>3</sub>                                 | -78          | -21          | -36               | 3.18  | 120.1             | CADRAE   |
| Boc-(4(4I-PhO-Pro)-OCH <sub>3</sub> )                    | -52          | -39          | 38                | 2.84  | 109.7             | GABPEH   |
| Boc-Hyp-OCH <sub>3</sub>                                 | -55          | -32          | 41                | 2.89  | 116.3             | INEMIX   |
| Ac-Hyp-OH                                                | -60          | -31          | 39                | 2.85  | 115.5             | POKKAD   |
| Ac-Hyp-OCH <sub>3</sub>                                  | -63          | 156          | 36                | 2.90  | 92.4              | RISDAY   |
| Ac-Hyp-OCH <sub>3</sub>                                  | -51          | 145          | 40                | 2.75  | 91.3              | RISDAY   |
| Ac-Flp-OCH <sub>3</sub>                                  | -55          | 140          | 38                | 2.75  | 99.1              | RISDEC   |
| Ac-Flp-OCH <sub>3</sub>                                  | -56          | 141          | 38                | 2.78  | 97.4              | RISDEC   |
| Ac-Mop-OCH <sub>3</sub>                                  | -58          | 148          | 37                | 2.84  | 94.6              | SODJEB   |
| Ac-Clp-NHCH <sub>3</sub>                                 | -77          | -18          | -37               | 3.16  | 121.6             | VEFBOZ   |
| Ac-Azp-OCH <sub>3</sub>                                  | -60          | 147          | 36                | 2.85  | 97.7              | WETNAL   |
| Boc-( <i>p</i> Tos-O)-Pro-OBn                            | -59          | 148          | 37                | 2.89  | 93.5              | YEJHEC   |
| <b><i>trans</i>-(2S,4S)</b>                              |              |              |                   |       |                   |          |
| Ac-mep-NHCH <sub>3</sub>                                 | -74          | -14          | 34                | 3.14  | 126.8             | CADREI   |
| Ac-mep-NHCH <sub>3</sub>                                 | -71          | -18          | 35                | 3.09  | 124.6             | CADREI   |
| BrBz-(Boc)-Pro-O <sup>t</sup> Bu                         | -75          | -14          | 37                | 3.20  | 125.5             | HALTAR   |
| Tfa-(4OBn-Pro)-NHCy                                      | -69          | 176          | -38               | 3.12  | 77.0              | KULQIT   |
| Tfa-(4OBn-Pro)-NHCy                                      | -74          | 179          | -39               | 3.15  | 79.6              | KULQIT   |
| Ac-(4NH <sub>3</sub> <sup>+</sup> -Pro)-OCH <sub>3</sub> | -74          | 157          | -34               | 3.01  | 95.1              | NAFKAJ   |
| Boc-(4 <sup>t</sup> Bu)-Pro-O <sup>t</sup> Bu            | -76          | 157          | -37               | 3.12  | 95.5              | RARMUT   |
| Bz-(4MeSO <sub>2</sub> O-Pro)-OH                         | -85          | -178         | -36               | 3.28  | 84.7              | TUHMEO   |
| Ac-clp-NHCH <sub>3</sub>                                 | -59          | 149          | 35                | 2.92  | 93.5              | VEFBIT   |
| Ac-clp-NHCH <sub>3</sub>                                 | -52          | 147          | 36                | 2.86  | 100.3             | VEFBIT   |
| <b><i>trans</i>-(2R,4R)</b>                              |              |              |                   |       |                   |          |
| Ac-(CF <sub>3</sub> -Pro)-OCH <sub>3</sub>               | 61           | 37           | -36               | 2.89  | 111.2             | YUCBUV   |
| <b><i>trans</i>-(2R,4S)</b>                              |              |              |                   |       |                   |          |
| Tfa-hyp-NHC <sub>6</sub> H <sub>3</sub> F <sub>2</sub>   | 63           | -139         | -39               | 2.95  | 103.1             | GAZGOG   |
| Ac-hyp-OH                                                | 61           | 30           | -40               | 2.86  | 115.5             | NAHYPL   |
| <b><i>cis</i>-(2S,4R)</b>                                |              |              |                   |       |                   |          |
| Boc-(4Vin-Pro)-OH                                        | -58          | -30          | 37                | 4.19  | 145.9             | PIGYEL   |
| Boc-(4MeSO <sub>2</sub> O-Pro)-O <sup>t</sup> Bu         | -55          | -22          | 39                | 4.37  | 152.8             | PEQVIT   |
| Ac-Azp-OCH <sub>3</sub>                                  | -82          | 173          | -35               | 4.39  | 77.9              | WETNAL   |
| Boc-(4Ph-Pro)-OH                                         | -73          | 148          | 40                | 4.37  | 91.6              | QUDVUG   |
| <b><i>cis</i>-(2R,4R)</b>                                |              |              |                   |       |                   |          |
| Boc- <sup>D</sup> Mop-OH                                 | 86           | -16          | 41                | 4.42  | 171.19            | WADVOO   |
| <b><i>cis</i>-(2S,4S)</b>                                |              |              |                   |       |                   |          |
| Boc-(4CF <sub>3</sub> -Pro)-OH                           | -66          | 177          | 40                | 4.28  | 73.7              | MOGQOO   |
| Boc-(4 <sup>t</sup> Bu-Pro)-OH                           | -75          | -10          | -34               | 4.33  | 67.0              | RARNAA   |
| Boc-mop-OH                                               | -85          | 18           | -41               | 4.40  | 171.8             | EMITIE   |
| Boc-cnp-OH                                               | -78          | n.d.         | -32               | 4.31  | n.d.              | TALBUD   |
| Ac-hyp-Ome                                               | -84          | 18           | -38               | 4.41  | 172.7             | EMITEA   |
| Boc-(4(4I-pho-Pro)-OH                                    | -76          | 1            | -38               | 4.38  | 163.1             | GABNUV   |
| Fmoc-(4(4I-pho)-Pro)-OH                                  | -83          | 177          | -37               | 4.41  | 78.9              | GABPAD   |
| Boc-Hyp-OPhAc                                            | -65          | 145          | 38                | 4.26  | 89.6              | FICZEX   |

<sup>a</sup> Stereochemistry of the 2- and the 4- positions are grouped.

<sup>b</sup> The exo and the endo ring pucker are indicated in blue and red, respectively.

<sup>c</sup> 'd' corresponds to the distance (in Å) between carbonyl oxygen atom (O<sub>i-1</sub>) of the residue preceding Pro (or analog) and the carbon atom of the carbonyl group of Pro (or analog) >C<sub>i</sub>=O<sub>i</sub>.

<sup>d</sup>  $\theta$  corresponds to the angle between O<sub>i-1</sub>, C<sub>i</sub> and O<sub>i</sub>.

**Table S3.** Dihedral angles of 3-substituted proline analogues in CSD.

| compound                                                           | abs. config | hydrogen replaced | $\phi^\circ$ | $\psi^\circ$ | $\chi_2^a$ | $d^b$ | $\theta^c$ | CSD      |
|--------------------------------------------------------------------|-------------|-------------------|--------------|--------------|------------|-------|------------|----------|
| <b>L-proline/trans</b>                                             |             |                   |              |              |            |       |            |          |
| Ac-(3F-Pro)-OMe                                                    | 2R,3R       | 3R                | -56          | 151          | 37         | 2.81  | 90.8       | LEWPAF   |
| Ac-(3Me-Pro)-NHMe                                                  | 2S,3R       | 3R                | -79          | 146          | -40        | 3.23  | 105.1      | BIJFAB10 |
| Ac-(3F-Pro)-OMe                                                    | 2R,3S       | 3S                | -71          | 158          | -35        | 3.08  | 95.4       | LEWXER   |
| Boc-(3Ph-Pro)- <sup>D</sup> Phe-NHMe                               | 2S,3R       | 3S                | -56          | 127          | 39         | 2.79  | 106.4      | BAPNEV   |
| Ac-(3(4-Cl-Ph)-Pro)-NHR                                            | 2S,3R       | 3S                | -51          | 138          | 41         | 2.72  | 97.0       | IFAXET   |
| Ac-(3(4-Cl-Ph)-Pro)-NHR                                            | 2S,3R       | 3S                | -59          | 140          | 42         | 2.86  | 99.5       | IFAXET   |
| Boc-(3Ph-Pro)- <sup>D</sup> Phe-NHMe                               | 2S,3R       | 3S                | -55          | 131          | 35         | 2.81  | 103.2      | BAPVEV   |
| Ac-(3OH-Pro)-NHMe                                                  | 2S,3S       | 3S                | -79          | 164          | -39        | 3.20  | 94.7       | EHUNEA   |
| Ac-(3Me-Pro)-NHMe                                                  | 2S,3S       | 3S                | -64          | -36          | 41         | 2.94  | 109.7      | CEDPUW   |
| Boc-(3CF <sub>3</sub> -Pro)-NHCH(CH <sub>3</sub> Ph)               | 2S,3S       | 3S                | -85          | 145          | -35        | 3.29  | 109.5      | SIGJUQ   |
| Boc-(3CF <sub>3</sub> -Pro)-NHCH(CH <sub>3</sub> Ph)               | 2S,3S       | 3S                | -73          | 135          | -32        | 3.10  | 111.0      | SIGJUQ   |
| Boc-(3CF <sub>3</sub> -Pro)-NHCH(CH <sub>3</sub> Ph)               | 2S,3S       | 3S                | -58          | 126          | 34         | 2.89  | 110.5      | SIGJUQ   |
| <b>D-proline/trans</b>                                             |             |                   |              |              |            |       |            |          |
| Cbz-(3iPr-Pro)-OH                                                  | 2R,3S       | 3R                | 50           | 46           | -34        | 2.79  | 101.4      | AWAVUQ   |
| Moc-(3(1-Cl-Pr)- <sup>D</sup> Pro)-OMe                             | 2R,3S       | 3R                | 61           | -157         | -39        | 2.93  | 88.8       | WEJSOT   |
| Ac-(3(4-Cl-Phe)-Pro)-NHR                                           | 2R,3R       | 3S                | 79           | -156         | 38         | 3.12  | 99.4       | WOBLAB   |
| <b>L-proline/cis</b>                                               |             |                   |              |              |            |       |            |          |
| Boc-(3Ph-Pro)-OBn                                                  | 2S,3R       | 3S                | -56          | 137          | 41         | 4.17  | 82.8       | DOSFIB   |
| Boc-(3OH-Pro)-OtBu                                                 | 2S,3S       | 3S                | -66          | 157          | -35        | 4.20  | 76.6       | DIDXUM   |
| Boc-(3carboxy-Pro)-OBn                                             | 2R,3S       | 3S                | 79           | -151         | 39         | 4.31  | 85.6       | TAZPOZ   |
| Boc-(3Ph-Pro)-OMe                                                  | 2S,3S       | 3R                | -59          | 149          | -38        | 4.18  | 82.4       | BALMOR   |
| Boc-(3carboxy-Pro)-OH                                              | 2S,3S       | 3S                | -58          | -33          | -32        | 4.22  | 141.8      | SUMZOP   |
| Boc-(3 <i>n</i> Pr-Pro)NH(CHCH <sub>3</sub> Ph)                    | 2S,3S       | 3S                | -53          | 138          | 33         | 4.24  | 88.2       | KEBVAO   |
| Boc-(3CF <sub>3</sub> -Pro)-NHCH(CH <sub>3</sub> Ph)               | 2S,3S       | 3S                | -63          | 141          | 38         | 4.27  | 84.5       | SIGJUQ   |
| <b>D-proline/cis</b>                                               |             |                   |              |              |            |       |            |          |
| Boc-(3CF <sub>3</sub> - <sup>D</sup> Pro)-NHCH(CH <sub>3</sub> Ph) | 2R,3S       | 3S                | 92           | -151         | 41         | 4.47  | 89.7       | SIGKAX   |
| Boc-(3Vin- <sup>D</sup> Pro)-OH                                    | 2R,3S       | 3S                | 76           | -171         | 38         | 4.32  | 76.6       | AWAVOK01 |
| Boc-(3Ph-Pro)-Obn                                                  | 2R,3R       | 3S                | 65           | -138         | 38         | 4.20  | 82.4       | DOSFIB   |
| Boc-(3Ph-Pro)-Obn                                                  | 2R,3S       | 3R                | 55           | -138         | -40        | 4.18  | 81.8       | DOTVOY   |
| Boc((3Ph- <sup>D</sup> Pro)-OMe                                    | 2R,3S       | 3R                | 57           | -147         | 37         | 4.16  | 82.3       | MISLEH   |

<sup>a</sup> The *exo* and *endo* ring puckers are shown in blue and red, respectively.

<sup>b</sup> 'd' corresponds to the distance (in Å) between carbonyl oxygen atom (O<sub>i-1</sub>) of the residue preceding Pro (or analog) and the carbon atom of the carbonyl group of Pro (or analog) >C<sub>i</sub>=O<sub>i</sub>.

<sup>c</sup>  $\theta$  corresponds to the angle between O<sub>i-1</sub>, C<sub>i</sub> and O<sub>i</sub>.

**Table S4.** Dihedral angles of 5-substituted proline analogues in CSD.

| compound                                                          | abs. config. | hydrogen replaced | $\phi^\circ$ | $\psi^\circ$      | $\chi_2^a$        | $d^b$ | $\theta^c$        | CSD      |
|-------------------------------------------------------------------|--------------|-------------------|--------------|-------------------|-------------------|-------|-------------------|----------|
| <b>L-proline-trans</b>                                            |              |                   |              |                   |                   |       |                   |          |
| Ac-(5OH-Pro)-Ome                                                  | 2S,5R        | 5R                | -72          | 160               | -38.6             | 3.09  | 94.3              | BOWHEA   |
| Boc-(5CNPPro)-Ome                                                 | 2S,5R        | 5S                | -57          | 145               | 36.5              | 2.90  | 93.3              | UDAQIB   |
| Ac-(COOMe-Pro)-Ome                                                | 2S,5R        | 5S                | -68          | 166               | 38.3              | 2.94  | 87.3              | GEBLAD   |
| Bz-(5Mes-Pro)-Ome                                                 | 2S,5R        | 5S                | -54          | 144               | 34.2              | 2.83  | 98.8              | GODYAA   |
| Ac-(5Me-Pro)-NHMe                                                 | 2S,5R        | 5R                | -66          | 152               | -38.9             | 3.01  | 97.6              | BIJFEF10 |
| Fm-(5Mes-Pro)-OH                                                  | 2S,5R        | 5S                | -57          | n.d. <sup>b</sup> | 30.5              | 2.88  | n.d. <sup>b</sup> | KENYEI   |
| Boc-(5Cnp)-Ome                                                    | 2S,5S        | 5R                | -75          | 157               | -34.9             | 3.15  | 95.0              | UDAQEX   |
| Ac-(5Me-Pro)-NHMe                                                 | 2S,5S        | 5S                | -65          | 150               | 36.7              | 2.93  | 95.9              | CEDROS   |
| <b>D-proline-trans</b>                                            |              |                   |              |                   |                   |       |                   |          |
| Ac-(CH <sub>2</sub> Ph-Pro)-Ome                                   | 2R,5R        | 5S                | 62           | -160              | 38.2              | 2.89  | 92.3              | YOVSIX   |
| Boc-(5-CF <sub>3</sub> -Pro)-Ome                                  | 2R,5S        | 5R                | 75           | -167              | -34.4             | 3.00  | 88.2              | UWILIX   |
| <b>L-proline-cis</b>                                              |              |                   |              |                   |                   |       |                   |          |
| Ph <sub>2</sub> Carbamoyl-5-Azp-Ome                               | 2S,5S        | 5S                | -51          | -178              | 31.9              | 3.95  | 60.8              | ZIKNEM   |
| Boc-((5-PhSO <sub>2</sub> -Pro)-OEt                               | 2S,5R        | 5R                | -48          | 150               | -33.6             | 3.87  | 69.4              | VEXJAK   |
| Bz-((COO <sub>2</sub> Et) <sub>2</sub> CCH <sub>3</sub> )-Pro-Oet | 2S,5S        | 5R                | -46          | -32               | -31.4             | 4.03  | 147.5             | EHUTEG   |
| Boc-(5-allyl)Pro-OtBu                                             | 2S,5S        | 5R                | -57          | 162               | -37.9             | 4.17  | 73.7              | BAVZEE   |
| Boc-(( <sup>t</sup> BuPh <sub>2</sub> Si)Oet)Pro-H                | 2S,5S        | 5R                | -49          | -37               | -24.4             | 4.11  | 138.3             | NEJKAO   |
| Boc-(5C <sub>2</sub> H <sub>4</sub> OH-Pro)-OtBu                  | 2S,5S        | 5R                | -60          | 156               | -36.0             | 4.18  | 77.0              | OBAZUM   |
| Boc-(5-(2-oxobutyl)Pro)-OMe                                       | 2S,5S        | 5R                | -56          | 153               | n.d. <sup>d</sup> | 4.13  | n.d. <sup>d</sup> | OVIMIR   |
| CBz-(PhOHEt-Pro)-O <sup>t</sup> Bu                                | 2S,5R        | 5S                | -77          | 180               | n.d. <sup>d</sup> | 4.17  | 74.5              | REMXOW   |
| CBz-(PhOHEt-Pro)-O <sup>t</sup> Bu                                | 2S,5S        | 5R                | -84          | -176              | -37.8             | 4.38  | 75.0              | REMXUC   |
| Bz-((5-bisEthoxycarbonylmethyl-Pro)-OEt                           |              |                   | -113         | 153               | -32.2             | 4.63  | 95.9              | EHUTAC   |
| <b>D-proline-cis</b>                                              |              |                   |              |                   |                   |       |                   |          |
| X-(5-CO <sub>2</sub> Me-Pro)-Ome                                  |              |                   | 63           | -163              | 38.3              | 4.20  | 75.5              | YEWKAM   |

<sup>a</sup> The *exo* and *endo* ring puckers are shown in blue and red, respectively.

<sup>b</sup> 'd' corresponds to the distance (in Å) between carbonyl oxygen atom (O<sub>i-1</sub>) of the residue preceding Pro (or analog) and the carbon atom of the carbonyl group of Pro (or analog) >C<sub>i</sub>=O<sub>i</sub>.

<sup>c</sup>  $\theta$  corresponds to the angle between O<sub>i-1</sub>, C<sub>i</sub> and O<sub>i</sub>.

<sup>d</sup> n.d. = no data (due to disorder)
